# Supplementary material for: Palindromic hyperbranched rolling circle amplification enabling ultrasensitive microRNA detection
Source: Royal Society of Chemistry journal article supplement (doi:10.1039/d2cc01370c), 2022-01-01
Supplement: d2cc01370c1.pdf [file d2cc01370c1.pdf]

Supporting Information for

## **Palindromic hyperbranched rolling circle amplification enabling ultrasensitive microRNA detection**

Jayeon Song, Yong Ju, Soohyun Kim, Hansol Kim, and Hyun Gyu Park\*

Department of Chemical and Biomolecular Engineering (BK 21+ program),  
KAIST, Daehak-ro 291, Yuseong-gu, Daejeon 34141, Republic of Korea

\* To whom correspondence should be addressed.

E-mail: [hgpark@kaist.ac.kr](mailto:hgpark@kaist.ac.kr) (H.G. Park); Phone: +82-42-350-3932; Fax: +82-42-350-3910.

# Contents

|                                                                                                                                                                           |    |
|---------------------------------------------------------------------------------------------------------------------------------------------------------------------------|----|
| <b>Materials and methods</b> .....                                                                                                                                        | 3  |
| <b>1. Materials</b> .....                                                                                                                                                 | 3  |
| <b>2. Preparation of DP</b> .....                                                                                                                                         | 3  |
| <b>3. Experimental procedures for the PH-RCA reaction</b> .....                                                                                                           | 4  |
| <b>4. Gel electrophoresis</b> .....                                                                                                                                       | 4  |
| <b>5. Melting curve analysis</b> .....                                                                                                                                    | 4  |
| <b>6. Quantitative reverse transcription-polymerase chain reaction (qRT-PCR)<br/>    protocol<br/>    for miRNA detection from the cell lines</b> .....                   | 5  |
| <b>Table S1.</b> Oligonucleotide sequences used in this work.....                                                                                                         | 6  |
| <b>Table S2.</b> Detection performance of this method when compared with alternative RCA-based<br>methods.....                                                            | 7  |
| <b>Figure S1.</b> Dumbbell probe comparison test of PH-RCA.....                                                                                                           | 8  |
| <b>Figure S2.</b> Polyacrylamide gel electrophoresis image of PH-RCA products obtained after the<br>PH-RCA reaction.....                                                  | 9  |
| <b>Figure S3.</b> Melting curve analysis for characterization of DP .....                                                                                                 | 10 |
| <b>Figure S4.</b> Optimization of the primer length, the palindromic domain length in DP, the<br>concentration of DP, the concentration of PP, and reaction time<br>..... | 11 |
| <b>Figure S5.</b> Reaction time to detect the samples at various target miR-141 concentrations with<br>the PH-RCA and qRT-PCR methods<br>.....                            | 12 |

**Figure S6.** The linear relationship between the  $F/F_0$  value and target miR-141 concentration spiked in human serum .....13

**Reference (Supporting)**.....14

## **Materials and methods**

### **1. Materials**

All DNA and RNA oligonucleotides used in this study were synthesized and purified with PAGE by Bioneer® (Daejeon, Korea). The sequences of the oligonucleotides are listed in Table S1. T4 DNA ligase, 10X T4 DNA ligase reaction buffer (500 mM Tris-HCl, 100 mM  $MgCl_2$ , 100 mM DTT, 10 mM ATP, pH 7.5), Phi29 DNA polymerase (Phi29 DNAP), and 10X Phi29 DNAP reaction buffer (500 mM Tris-HCl, 100 mM  $MgCl_2$ , 100 mM  $(NH_4)_2SO_4$ , 40 mM DTT, pH 7.5) were purchased from New England Biolabs Inc. (Beverly, MA, USA). SYBR Green I (10,000X) was purchased from Invitrogen (Carlsbad, CA, USA). All other chemicals were of analytical grade and used without further purification.

### **2. Preparation of DP**

First, the hairpin probe (HP) solution containing 25  $\mu M$  of hairpin probe 1 (HP1) and hairpin probe 2 (HP2) in 1X T4 DNA ligase reaction buffer was heated at 95°C for 5 min followed by cooling to 25°C (0.1°C/s), allowing the annealing of HP1 and HP2. The ligation reaction was conducted at 25°C for 10 min by mixing the HP solution and DNA ligase in a final volume of 50  $\mu L$  containing 1  $\mu M$  HP1 and HP2, 40 U/ $\mu L$  T4 DNA ligase, and 1X T4

DNA ligase reaction buffer. The produced DP was stored at 4 °C prior to use in the PH-RCA reaction.

### **3. Experimental procedures for the PH-RCA reaction**

The PH-RCA reaction was conducted in a final volume of 40  $\mu$ L containing 100 nM DP, 500 nM PP, 250  $\mu$ M dNTPs, 1X SYBR Green I, 5 U/ $\mu$ L Phi29 DNAP, 1X Phi29 DNAP reaction buffer, and target miRNA at varying concentrations. The reaction mixture was incubated at 30 °C for 30 min and the fluorescence signal from SYBR Green I staining was measured using a Tecan Infinite M200 pro microplate reader (Mnnedorf, Switzerland).

### **4. Gel electrophoresis**

For polyacrylamide gel electrophoresis (PAGE), a 10  $\mu$ L aliquot of the reaction solution was resolved on 15% polyacrylamide gel in 1X TBE buffer at 120 V for 120 min. After ethidium bromide (EtBr) staining, gels were scanned using UV transilluminator (Bio-rad, CA, USA).

For agarose gel electrophoresis, a 5  $\mu$ L aliquot of the reaction solution was resolved on 2% EtBr agarose gel in 1X TBE buffer at 100 V for 40 min. Gels were scanned using UV transilluminator (Bio-rad, CA, USA).

## **5. Melting curve analysis**

The PH-RCA reaction solution containing 1X SYBR Green I (40  $\mu\text{L}$ ) was heated at 30  $^{\circ}\text{C}$  and the fluorescence signal was measured on a CFX Connect<sup>TM</sup> Real-Time System (Bio-Rad, CA, USA) as the temperature was increased from 30  $^{\circ}\text{C}$  to 90  $^{\circ}\text{C}$  with an increment of 0.5  $^{\circ}\text{C}$ . The first derivative plot  $[-d(\text{RFU})/dT]$  was used to determine the melting temperature.

## **6. Quantitative reverse transcription-polymerase chain reaction (qRT-PCR) protocol for miRNA detection from the cell lines**

qRT-PCR was conducted using THUNDERBIRD<sup>TM</sup> Probe One-step qRT-PCR Kit according to the manufacturer's protocol. The reaction was conducted in 20  $\mu\text{L}$  of sample solution containing 5.2  $\mu\text{L}$  of DW, 10  $\mu\text{L}$  of reaction buffer (2X), 1  $\mu\text{L}$  of stem-loop primer (10  $\mu\text{M}$ ), 0.8  $\mu\text{L}$  of forward primer (10  $\mu\text{M}$ ), 0.8  $\mu\text{L}$  of reverse primer (10  $\mu\text{M}$ ), 0.8  $\mu\text{L}$  of TaqMan probe (10  $\mu\text{M}$ ), 0.4  $\mu\text{L}$  of extracted total RNA analyte (1  $\mu\text{g}/\mu\text{L}$ ), 0.5  $\mu\text{L}$  of DNA polymerase (0.2 U/ $\mu\text{L}$ ), and 0.5  $\mu\text{L}$  of RT enzyme (0.5 U/ $\mu\text{L}$ ). The solution was incubated at 50  $^{\circ}\text{C}$  for 10 min, heated up to 95  $^{\circ}\text{C}$  for 1 min, and subjected to the temperature cycle step (40 cycles) consisting of 95  $^{\circ}\text{C}$  for 15 sec and 60  $^{\circ}\text{C}$  for 45 sec. The fluorescent signal from TaqMan probe was measured at the end of every temperature cycle by using CFX Connect<sup>TM</sup> Real-Time PCR Detection System (Bio-Rad, CA, USA).

**Table S1.** Oligonucleotide sequences used in this work.

| Name                           | Oligonucleotide sequence (5' → 3')                                                                 |
|--------------------------------|----------------------------------------------------------------------------------------------------|
| miR-141                        | UAA CAC UGU CUG GUA AAG AUG G                                                                      |
| miR-21                         | UAG CUU AUC AGA CUG AUG UUG A                                                                      |
| miR-200c                       | UAA UAC UGC CGG GUA AUG AUG GA                                                                     |
| miR let-7a                     | UGA GGU AGU AGG UUG UAU AGU U                                                                      |
| miR let-7b                     | UGA GGU AGU AGG UUG UGU GGU U                                                                      |
| miR let-7c                     | UGA GGU AGU AGG UUG UAU GGU U                                                                      |
| miR let-7d                     | AGA GGU AGU AGG UUG CAU AGU U                                                                      |
| Blocked target miR-141         | UAA CAC UGU CUG GUA AAG AUG G [PO <sub>4</sub> ] <sup>a</sup>                                      |
| Single-base mismatched miR-141 | UAA CAG <sup>b</sup> UGU CUG GUA AAG AUG G                                                         |
| HP1 for DP                     | [PO <sub>4</sub> ] <sup>a</sup> CGC GCG TAA TTT TCC ATC TTT ACC<br>AGA CAG TGT TAA AAA TTA CG      |
| HP2 for DP                     | [PO <sub>4</sub> ] <sup>a</sup> CGC GCG CGT AAT TTT CCA TCT TTA<br>CCA GAC AGT GTT AAA AAT TAC GCG |
| HP1 for CDP                    | [PO <sub>4</sub> ] <sup>a</sup> GTC CCG GCC TTT TCC ATC TTT ACC<br>AGA CAG TGT TAA AAA GGC CG      |
| HP2 for CDP                    | [PO <sub>4</sub> ] <sup>a</sup> GGA GCC CAG ATT TTT CCA TCT TTA<br>CCA GAC AGT GTT AAA AAT CTG GG  |
| CP 14 mer                      | AAA AAA AAA AAA AA                                                                                 |
| PP 14 mer                      | TAC GCG CGC GCG TA                                                                                 |
| PP 12 mer                      | ACG CGC GCG CGT                                                                                    |
| PP 10 mer                      | CGC GCG CGC G                                                                                      |
| PP 8 mer                       | GCG CGC GC                                                                                         |
| PP 6 mer                       | CGC GCG                                                                                            |

NPP 8 mer

CGC GAC CC

<sup>a</sup> [PO<sub>4</sub>] indicates the modification of phosphate group at 5' or 3'-end.

<sup>b</sup> Underlined letter in single-base mismatched miR-141 indicates the mismatched base with target miR-141.

**Table S2.** Detection performance of this method when compared with alternative RCA-based methods.

| Method             | LOD     | Linear range    | Reference |
|--------------------|---------|-----------------|-----------|
| SDA-RCA            | 0.18 pM | 0.1 pM – 10 nM  | S1        |
| Ligation-RCA       | 0.8 fM  | 1 fM – 10 pM    | S2        |
| Target-primed BRCA | 10 fM   | 0.025 pM – 1 pM | S3        |
| P-ERCA             | 0.24 zM | 0.3 zM – 18 zM  | S4        |
| CEAM-RCA           | 12 fM   | 25 fM – 1 pM    | S5        |
| PH-RCA             | 18.5 aM | 100 aM – 1 nM   | This work |

**Figure S1.** Dumbbell probe comparison test of PH-RCA. (a) Fluorescence emission spectra from SYBR Green I staining of the PH-RCA reaction products with DP containing the palindromic domain and control dumbbell probe (CDP) containing the non-palindromic domain. (b) The fluorescence intensity at 523 nm obtained from DP containing the palindromic domain and CDP containing the non-palindromic domain. The final concentrations of target miR-141, DP, CDP, PP, NPP, and Phi29 DNAP are 1 nM, 10 nM, 10 nM, 1  $\mu$ M, 1  $\mu$ M, and 5 U/ $\mu$ L, respectively.

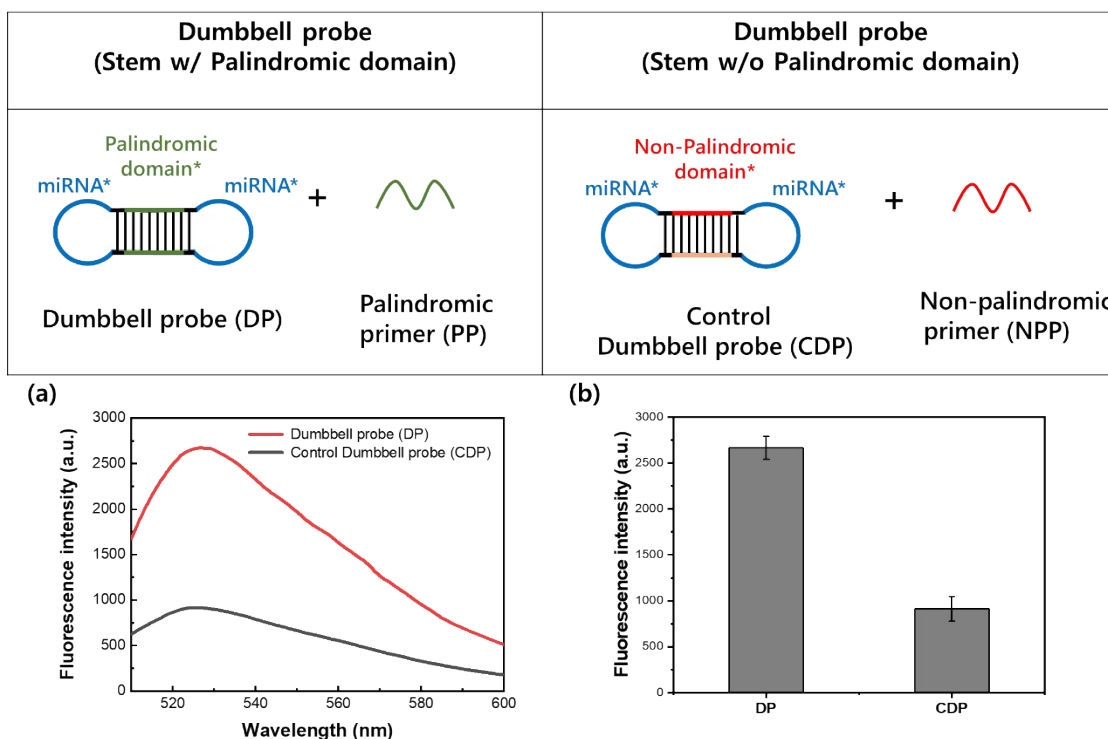



**Figure S2.** Polyacrylamide gel electrophoresis image of PH-RCA products obtained after the PH-RCA reaction (L: Ultra low range ladder, 1: Target miR-141, 2: HP1, 3: HP2, 4: PP, 5: DP, 6: DP + Target miR-141, 7: DP + PP, 8: DP + Target miR-141 + PP, 9: DP + Target miR-141 + Phi 29 DNAP, 10: DP + Target miR-141 + PP + Phi 29 DNAP, 11: DP + PP + Phi 29 DNAP). The final concentrations of target miR-141, DP, PP, and Phi29 DNAP are 100 nM, 100 nM, 1  $\mu$ M, and 5 U/ $\mu$ L, respectively.

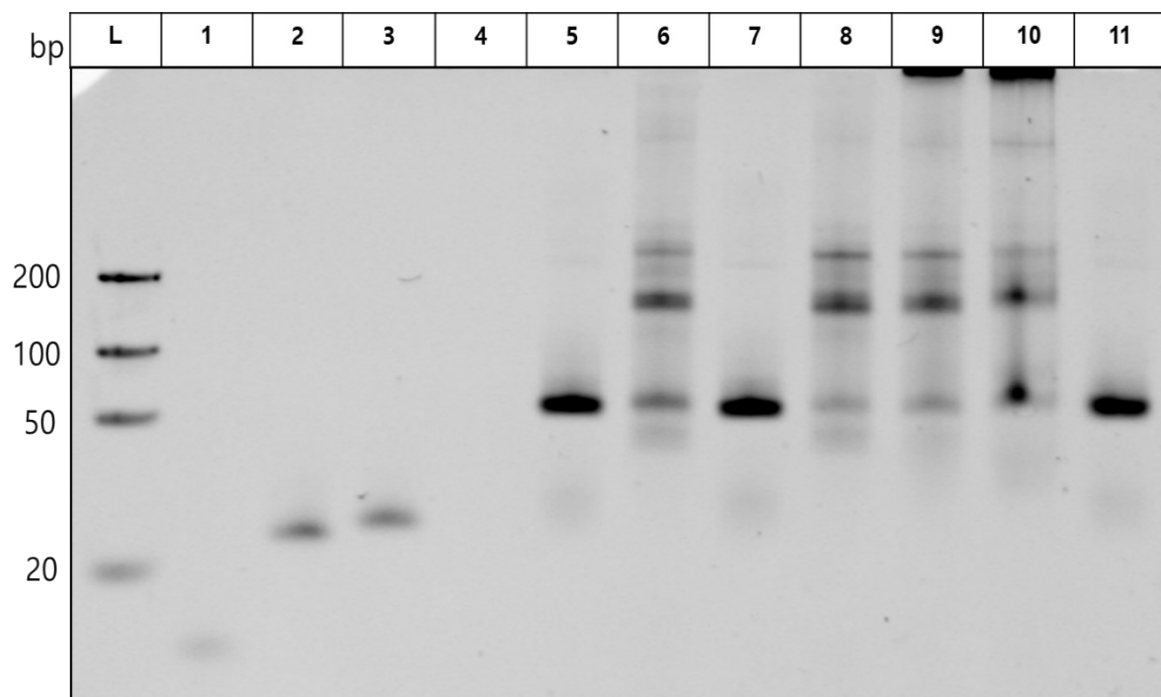

**Figure S3.** Melting curve analysis for characterization of DP. (a) Fluorescence emission spectra from SYBR Green I for confirming the formation of DP (1: DP, 2: HP1, 3: HP2). (b) Fluorescence emission spectra from SYBR Green I during the PH-RCA reaction (1: DP, 2: DP+ Target miR-141, 3: DP + PP, 4: DP + Target miR-141 + PP, 5: DP + PP + Phi 29 DNAP, 6: DP + Target miR-141 + PP + Phi 29 DNAP). The final concentrations of target miR-141, HP1, HP2, DP, PP, and Phi29 DNAP are 100 nM, 100 nM, 100 nM, 100 nM, 1  $\mu$ M, and 5 U/ $\mu$ L, respectively.

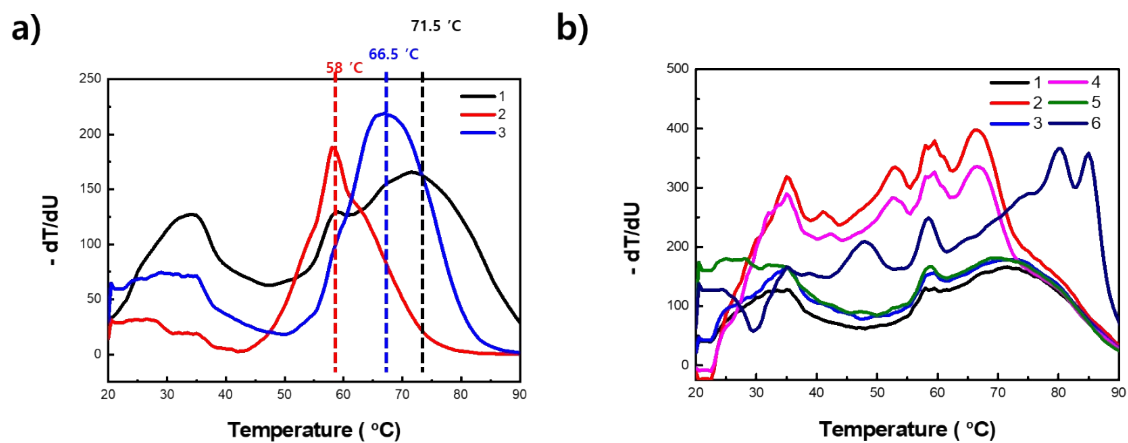

**Figure S4.** Optimization of the primer length, the palindromic domain length in DP, the concentration of DP, the concentration of PP, and reaction time. The  $F/F_0$  value, where  $F_0$  and  $F$  represent the fluorescence intensities at 523 nm from SYBR Green I in the absence and presence of target miR-141, respectively. The final concentrations of target miR-141, DP, PP, and Phi29 DNAP are 1 nM, 10 nM, 1  $\mu$ M, and 5 U/ $\mu$ L, respectively.

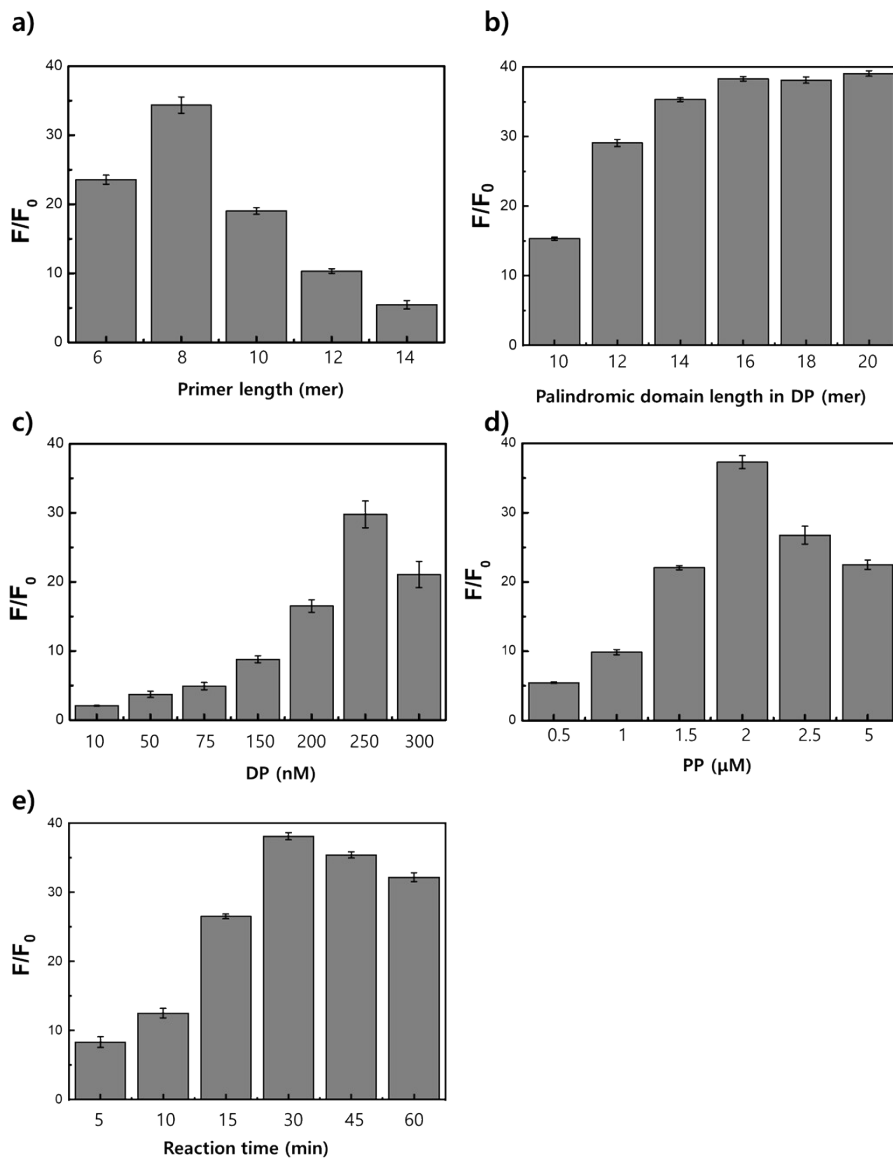

**Figure S5.** Reaction time to detect the samples at various target miR-141 concentrations with the PH-RCA and qRT-PCR methods. The final concentrations of DP, PP, and Phi29 DNAP are 10 nM, 1  $\mu$ M, and 5 U/ $\mu$ L, respectively.

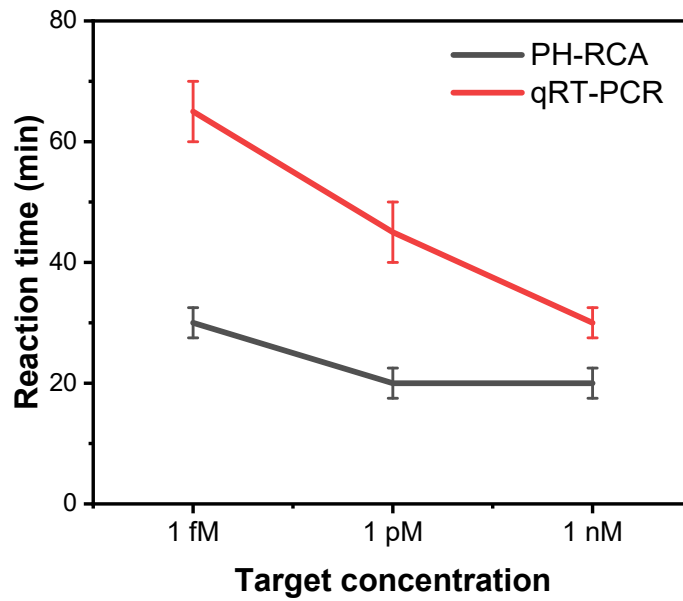

**Figure S6.** The linear relationship between the  $F/F_0$  value and target miR-141 concentration spiked in human serum, where  $F_0$  and  $F$  represent the fluorescence intensities at 523 nm from SYBR Green I in the absence and presence of target miR-141 spiked in human serum, respectively. The final concentrations of target miR-141, DP, PP, and Phi29 DNAP are 1 nM, 10 nM, 1  $\mu$ M, and 5 U/ $\mu$ L, respectively.

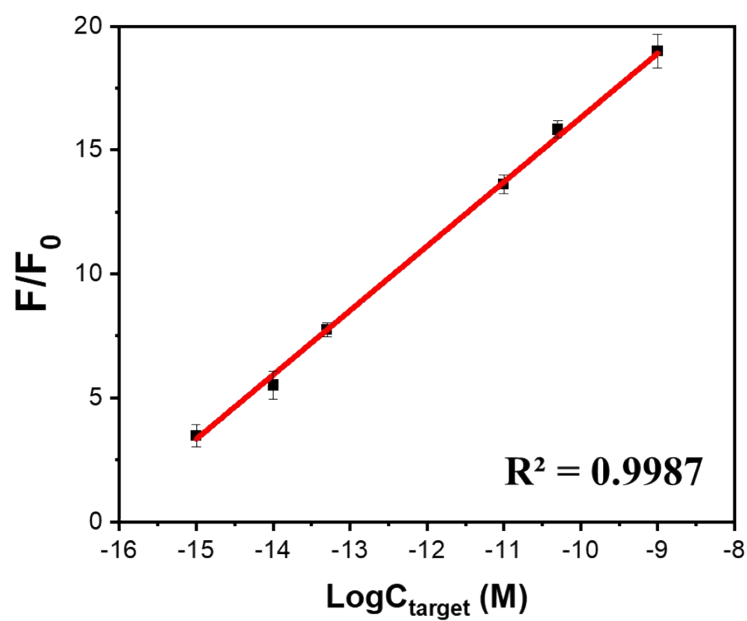

## References

- S1. Zhang, L. R., Zhu, G., Zhang, C. Y., *Anal. Chem.* 2014, **86**, 6703-6709.
- S2. CAO, Anping., ZHANG, Chun-yang., *Anal. Chem.* 2012, **84**, 6199-6205.
- S3. CHENG, Yongqiang, et al. *Angew. Chem. Int. Ed. Engl.* 2009, **121**, 3318-3322.
- S4. LIU, Haiyun, et al. *Anal. Chem.* 2013, **85**, 7941-7947.

- S5. Cui, Liang., Zhu, Zhi., Lin, Ninghang., Zhang, Huimin, Guan, Zhichao.,  
JAMESÁYANG, Chaoyong., *Chem. Commun.* 2014, **50**, 1576-1578.
